### S3 Fig

| ID             | Description                                                                    | Value       | Range                              | Data                                                   |
|----------------|--------------------------------------------------------------------------------|-------------|------------------------------------|--------------------------------------------------------|
| a <sub>1</sub> | Maximum auto-activation rate of T-bet                                          | 0.203833    |                                    | [1]                                                    |
| a <sub>2</sub> | Maximum auto-activation rate of ROR $\gamma$ t                                 | 0.815603    | Min: 0.00203833<br>Max: 2.03833    | 10 $\times$ either side of value for T-bet [1]         |
| a <sub>3</sub> | Maximum production rate of IFN- $\gamma$                                       | 0.007497877 | Min: 0.00203833<br>Max: 2.03833    | 10 $\times$ either side of value for IFN- $\gamma$ [2] |
| a <sub>4</sub> | Maximum production rate of IL21                                                | 0.019987613 | Min: 0.000203833<br>Max: 0.0203833 | 10 $\times$ either side of value for IFN- $\gamma$ [2] |
| a <sub>5</sub> | Maximum stimulation rate of receptor X                                         | 0.019987613 | Min: 5<br>Max: 30                  | [2]                                                    |
| a <sub>6</sub> | Rate of T-bet promotion or ROR $\gamma$ t inhibition                           | 0.304618    | Min: 0.002<br>Max: 2               | 10 $\times$ either side of value for IL12 [2]          |
| b <sub>1</sub> | Basal transcription rate of T-bet (per min)                                    | 0.00203833  |                                    | [1]                                                    |
| b <sub>2</sub> | Basal transcription rate of ROR $\gamma$ t                                     | 0.0172893   | Min: 0.00203833<br>Max: 0.203833   | 10 $\times$ either side of value for T-bet [1]         |
| g <sub>1</sub> | Level of ROR $\gamma$ t when transcription of T-bet is at half maximum         | 0.456596    | Min: 0.0001<br>Max: 1.0            | 10 $\times$ either side of value for T-bet/GATA-3 [1]  |
| g <sub>2</sub> | Level of T-bet when transcription of ROR $\gamma$ t is at half maximum         | 0.83170631  | Min: 0.0001<br>Max: 1.0            | 10 $\times$ either side of value for T-bet/GATA-3 [1]  |
| g <sub>3</sub> | Level of ROR $\gamma$ t when transcription of IFN- $\gamma$ is at half maximum | 0.625864154 | Min: 0.0001<br>Max: 1.0            | 10 $\times$ either side of value for T-bet/GATA-3 [1]  |
| g <sub>4</sub> | Level of T-bet when transcription of IL21 is at half maximum                   | 0.760239275 | Min: 0.0001<br>Max: 1.0            | 10 $\times$ either side of value for T-bet/GATA-3 [1]  |
| $\mu_1$        | Decay rate of T-bet mRNA                                                       | 0.096016199 | Min: 0.00020833<br>Max: 0.020833   | 10 $\times$ either side of value for T-bet [1]         |
| $\mu_2$        | Decay rate of ROR $\gamma$ t mRNA                                              | 0.18586844  | Min: 0.00020833<br>Max: 0.020833   | 10 $\times$ either side of value for T-bet [1]         |
| $\mu_3$        | Decay rate of C <sub>1</sub>                                                   | 0.1734      | Decay rate of IL12                 | [3]                                                    |

|         |                                                                                  |             |                                  |                                                                     |
|---------|----------------------------------------------------------------------------------|-------------|----------------------------------|---------------------------------------------------------------------|
| $\mu_4$ | Decay rate of $C_{17}$                                                           | 2.038828189 | Min: 0.4026<br>Max: 2.082        | Range of decay rates of TGF- $\beta$ , IL-6 and IL-23 [4,5]         |
| $\mu_5$ | Decay rate of IFN- $\gamma$ mRNA                                                 | 0.18586844  | Min: 0.00020833<br>Max: 0.020833 | $10 \times$ either side of value for T-bet [2]                      |
| $\mu_6$ | Decay rate of IL-21 mRNA                                                         | 0.18586844  | Min: 0.00020833<br>Max: 0.020833 | $10 \times$ either side of value for T-bet [2]                      |
| $\mu_7$ | Decay rate of IL21 mRNA                                                          | 0.633595    | Min: 0.004026<br>Max: 2.082      | $10 \times$ either side of value for IL12R [2]                      |
| $\mu_8$ | Decay rate of receptor X- $C_X$ complex                                          | 0.527035    | Min: 0.004026<br>Max: 2.082      | $10 \times$ either side of value for IL12R [2]                      |
| $\mu_9$ | Decay rate of $C_X$                                                              | 0.125304    | Min: 0.004026<br>Max: 2.082      | $10 \times$ either side of range for IL12, IL6 and TGF- $\beta$ [2] |
| $k_1$   | Level of $C_1$ at which T-bet transcription is at half maximum                   | 1           |                                  | [1,2]                                                               |
| $k_2$   | Level of $C_{17}$ at which ROR $\gamma$ t transcription is at half maximum       | 1           |                                  | Same as T-bet [1,2]                                                 |
| $k_3$   | Level of T-bet at which T-bet transcription is at half maximum                   | 1           |                                  | Same as T-bet [1,2]                                                 |
| $k_4$   | Level of ROR $\gamma$ t at which ROR $\gamma$ t transcription is at half maximum | 1           |                                  | Same as T-bet [1,2]                                                 |
| $k_5$   | Level of T-bet at which transcription of IFN- $\gamma$ mRNA is at half maximum   | 1           |                                  | [2]                                                                 |
| $k_6$   | Level of ROR- $\gamma$ t at which transcription of IL21 mRNA is at half maximum  | 1           |                                  | Same as T-bet [2]                                                   |
| $k_7$   | Rate of conversion of IL21 mRNA into protein                                     | 0.481067361 |                                  | [1,2]                                                               |
| $k_8$   | Rate of conversion of IFN- $\gamma$ mRNA into protein                            | 0.307552055 |                                  | [1,2]                                                               |
| $k_9$   | Level of ROR- $\gamma$ t at which transcription of receptor X is at half maximum | 66.7474     | Min:1<br>Max: 100                | $\times$ either side of value for T-bet and IL12 [2]                |

|          |                                                                                                           |          |                               |                                              |
|----------|-----------------------------------------------------------------------------------------------------------|----------|-------------------------------|----------------------------------------------|
| $k_{10}$ | Level of $C_X$ -receptor X at which promotion of T-bet or inhibition of ROR $\gamma$ t is at half maximum | 2.60342  | Min: 0.5<br>Max: 5            | 10 $\times$ either side of value used by [2] |
| $k_{11}$ | Rate of formation of $C_X$ -receptor X complex                                                            | 0.545609 | Min: 0.01<br>Max: 1           | 10 $\times$ value used by [2] for IL12R      |
| $s_1$    | Rate of stimulation of T-bet by external cytokines                                                        | 0.208033 |                               | [1, 2]                                       |
| $s_2$    | Rate of stimulation of ROR- $\gamma$ t by external cytokines                                              | 1.35863  | Min: 0.020833<br>Max: 2.08033 | [1, 2]                                       |

**S3 Fig: Ranges of all parameters used in the ASPASIA generated models**

## References

1. Yates A, Callard R, Stark J (2004) Combining cytokine signalling with T-bet and GATA-3 regulation in Th1 and Th2 differentiation: a model for cellular decision-making. *Journal of Theoretical Biology* 231: 181–196.
2. Schulz EG, Mariani L, Radbruch A, Höfer T (2009) Sequential polarization and imprinting of type 1 T helper lymphocytes by interferon-gamma and interleukin-12. *Immunity* 30: 673–683.
3. Bajetta E, Del Vecchio M, Mortarini R, Nadeau R, Rakhit A, et al. (1998) Pilot study of subcutaneous recombinant human interleukin 12 in metastatic melanoma. *Clinical Cancer Research: An Official Journal of the American Association for Cancer Research* 4: 75–85.
4. Kaminska B, Wesolowska A, Danilkiewicz M (2005) TGF beta signalling and its role in tumour pathogenesis. *Acta Biochimica Polonica* 52: 329–337.
5. Waage A, Brandtzaeg P, Halstensen A, Kierulf P, Espevik T (1989) The complex pattern of cytokines in serum from patients with meningococcal septic shock. Association between interleukin 6, interleukin 1, and fatal outcome. *The Journal of Experimental Medicine* 169: 333–338.
