# Supplementary material for: ASPASIA: A toolkit for evaluating the effects of biological interventions on SBML model behaviour
Source: PubMed Central journal article supplement (PMC5315406; doi:10.1371/journal.pcbi.1005351), 2017-02-03
Supplement: pcbi.1005351.s003.pdf [file pcbi.1005351.s003.pdf]

## S2 Fig

### List of Model Equations

|                                        |                                                                              |
|----------------------------------------|------------------------------------------------------------------------------|
| C1 induced T-bet                       | $\frac{s_1 \cdot C_1}{(k_1 + C_1) \cdot (1 + \frac{RORgt}{g_2})}$            |
| C17 induced RO-R $\gamma$ t            | $\frac{s_2 \cdot C_{17}}{(k_2 + C_{17}) \cdot (1 + \frac{Tbet}{g_1})}$       |
| Baseline Transcription T-bet           | $b_1$                                                                        |
| Baseline Transcription ROR- $\gamma$ t | $b_2$                                                                        |
| Decay T-bet                            | $-\mu_1 \cdot Tbet$                                                          |
| Decay ROR- $\gamma$ t                  | $-\mu_2 \cdot RORgt$                                                         |
| Decay C1                               | $-\mu_3 \cdot C_1$                                                           |
| Decay C17                              | $-\mu_4 \cdot C_{17}$                                                        |
| Auto-stimulation T-bet                 | $\frac{a_1 \cdot T - bet^n}{(k_3^n + Tbet^n) \cdot (1 + \frac{RORgt}{g_2})}$ |
| Auto-stimulation ROR- $\gamma$ t       | $\frac{a_2 \cdot RORgt^n}{(k_4^n + RORgt^n) \cdot (1 + \frac{Tbet}{g_1})}$   |
| T-bet-induced IFN- $\gamma$            | $\frac{a_3 \cdot Tbet}{(k_5 + Tbet) \cdot (1 + \frac{RORgt}{g_3})}$          |
| RORgt-induced IL21                     | $\frac{a_5 \cdot RORgt}{(k_6 + RORgt) \cdot (1 + \frac{Tbet}{g_4})}$         |
| Decay IFN- $\gamma$                    | $-\mu_5 \cdot IFNg$                                                          |
| Decay IL21                             | $-\mu_6 \cdot IL21$                                                          |
| IL21 to C17                            | $k_7 \cdot IL21$                                                             |
| IFNg to C1                             | $k_8 \cdot IFNg$                                                             |

S2 Fig: Equations governing processes involved in the model described in Figure 3.
