# Supplementary material for: ASPASIA: A toolkit for evaluating the effects of biological interventions on SBML model behaviour
Source: PubMed Central journal article supplement (PMC5315406; doi:10.1371/journal.pcbi.1005351), 2017-02-03
Supplement: pcbi.1005351.s006.pdf [file pcbi.1005351.s006.pdf]

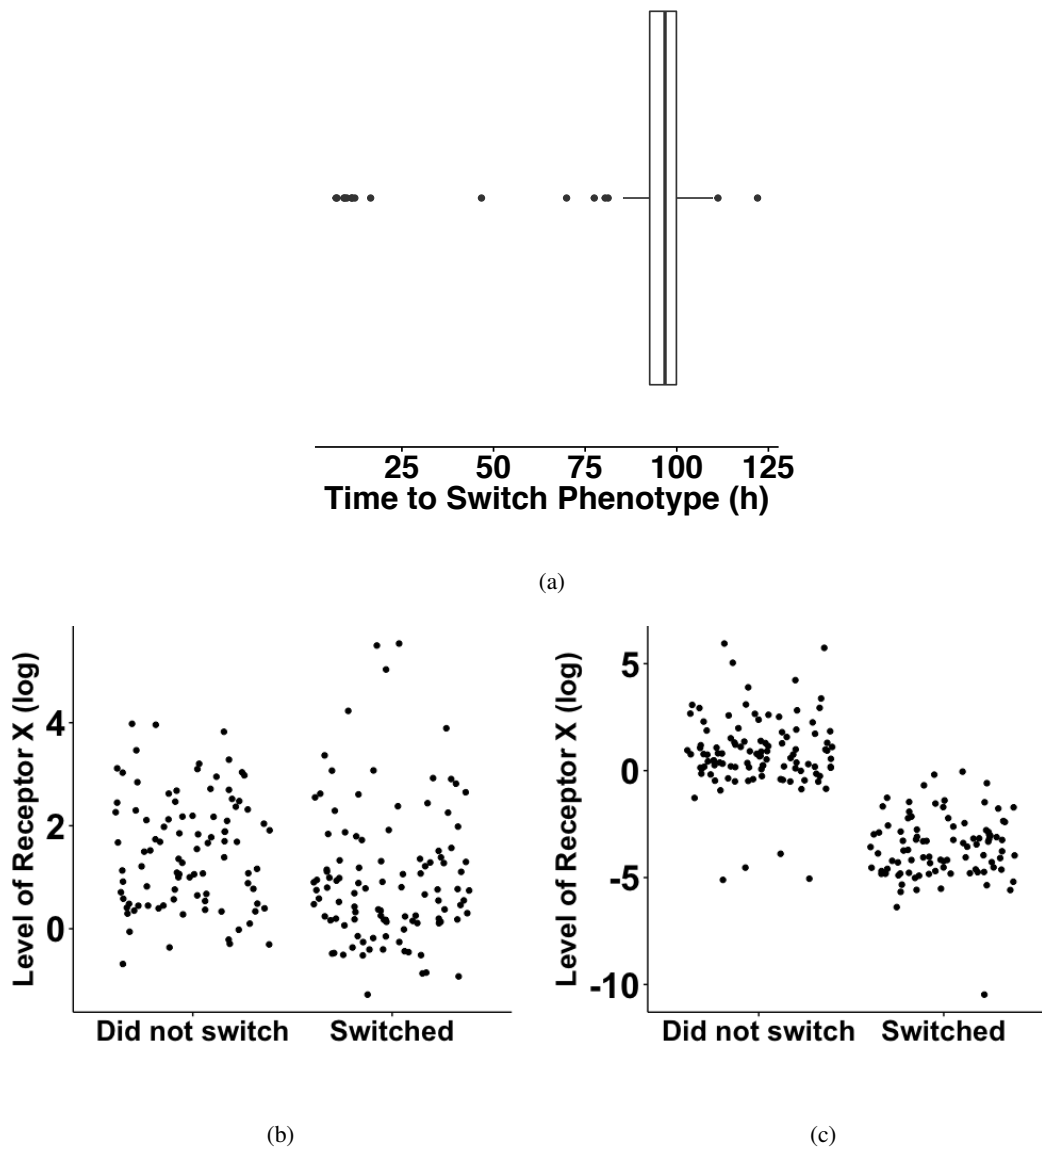

**S5 Fig: Characteristics of receptor X expression in the model where T-bet promotes phenotype switching.** (A) Boxplot of time taken for a phenotype switch to occur following stimulation with  $C_X$  ( $n=84$ ). (B) Level of receptor X prior to addition of  $C_X$ . (C) Level of receptor X following stimulation with  $C_X$ .
