# Supplementary material for: ASPASIA: A toolkit for evaluating the effects of biological interventions on SBML model behaviour
Source: PLoS Comput Biol. 2017 Feb 3;13(2):e1005351. doi: 10.1371/journal.pcbi.1005351 (PMC5315406; doi:10.1371/journal.pcbi.1005351)
Supplement: S1 Table — Definitions of the XML tags in the ASPASIA Settings file. An example file can be downloaded from the ASPASIA website (http://www.york.ac.uk/ycil/software/ASPASIA). (PDF) [file pcbi.1005351.s001.pdf]

S1 Table

**S1 Table: ASPASIA Settings File Tags.** Definitions of the XML tags in the ASPASIA Settings file. An example file can be downloaded from the ASPASIA website ([www.york.ac.uk/ycil/software/ASPASIA](http://www.york.ac.uk/ycil/software/ASPASIA))

| Tag                                         | Description                                                                                                                                                                                                                                                                                                                                                                                                                                                                                                                                                                                                                                                                                                                                                                                                                                                                                                                                                                                                                                                                                                                                                                                                                                                                                                                                                                                                                                                                           |
|---------------------------------------------|---------------------------------------------------------------------------------------------------------------------------------------------------------------------------------------------------------------------------------------------------------------------------------------------------------------------------------------------------------------------------------------------------------------------------------------------------------------------------------------------------------------------------------------------------------------------------------------------------------------------------------------------------------------------------------------------------------------------------------------------------------------------------------------------------------------------------------------------------------------------------------------------------------------------------------------------------------------------------------------------------------------------------------------------------------------------------------------------------------------------------------------------------------------------------------------------------------------------------------------------------------------------------------------------------------------------------------------------------------------------------------------------------------------------------------------------------------------------------------------|
| sbmlFormat                                  | Whether the model file is an SBML model. Set to true (Allows future ASPASIA extensions).                                                                                                                                                                                                                                                                                                                                                                                                                                                                                                                                                                                                                                                                                                                                                                                                                                                                                                                                                                                                                                                                                                                                                                                                                                                                                                                                                                                              |
| pathToSimulationParameterFile               | Full path to the SBML model being processed.                                                                                                                                                                                                                                                                                                                                                                                                                                                                                                                                                                                                                                                                                                                                                                                                                                                                                                                                                                                                                                                                                                                                                                                                                                                                                                                                                                                                                                          |
| parameterFileOutputFolder                   | Full path to folder where generated SBML models should be stored.                                                                                                                                                                                                                                                                                                                                                                                                                                                                                                                                                                                                                                                                                                                                                                                                                                                                                                                                                                                                                                                                                                                                                                                                                                                                                                                                                                                                                     |
| parameter                                   | Information about each parameter or species concentration that is subject to an intervention or sensitivity analysis study, dependent on the technique being employed. For Robustness analysis (local), the parameter type (double or integer), minimum value, maximum value, value to use as increment in the sampling, and the parameters calibrated value, must be specified as attributes of the XML tag. The value of the tag is the parameter name:<br><code>&lt;parameter type='double' min='0.01' max='0.1' inc='0.01' baseline='0.05'&gt;SpleenTCellArr&lt; /parameter&gt;</code><br>For eFAST or Latin-Hypercube parameter sampling (global), specify the type, minimum, and maximum values:<br><code>&lt;parameter type='double' min='0.01' max='0.1'&gt;SpleenTCellArr&lt; /parameter&gt;</code><br>For an Intervention study, the parameter or species name is the tag value. The attributes are a double value and an intervention method, namely (in italics): (i) <i>replace</i> the value of this parameter or concentration with that in the settings file; (ii) <i>add</i> the value in the settings file to that in the SBML file; (iii) subtract the value in the settings file from that in the SBML file; (iv) <i>multiply</i> the value in the SBML file by that in the settings file; (v) <i>divide</i> the value in the model by that in the settings file:<br><code>&lt;parameter value='0.1' method='multiply'&gt;SpleenTCellArr&lt;/parameter&gt;</code> |
| Latin-Hypercube Sampling Specific Settings: |                                                                                                                                                                                                                                                                                                                                                                                                                                                                                                                                                                                                                                                                                                                                                                                                                                                                                                                                                                                                                                                                                                                                                                                                                                                                                                                                                                                                                                                                                       |
| numberparameterSamples                      | The number of perturbed SBML models to generate.                                                                                                                                                                                                                                                                                                                                                                                                                                                                                                                                                                                                                                                                                                                                                                                                                                                                                                                                                                                                                                                                                                                                                                                                                                                                                                                                                                                                                                      |
| algorithm                                   | Sampling algorithm to use, 'normal' or 'optimal'. Normal selects parameter sets while attempting to minimise correlations. Optimal selects sets that entirely cover the parameter space, but the computation period is long (>48 hours for 6 parameters).                                                                                                                                                                                                                                                                                                                                                                                                                                                                                                                                                                                                                                                                                                                                                                                                                                                                                                                                                                                                                                                                                                                                                                                                                             |
| lhcPreGeneratedSampleFile                   | Runs the analysis with an existing parameter value set after a model file has been changed. This is the path to the parameter CSV file. No parameter information is required.                                                                                                                                                                                                                                                                                                                                                                                                                                                                                                                                                                                                                                                                                                                                                                                                                                                                                                                                                                                                                                                                                                                                                                                                                                                                                                         |
| LHC Data Analysis Settings:                 |                                                                                                                                                                                                                                                                                                                                                                                                                                                                                                                                                                                                                                                                                                                                                                                                                                                                                                                                                                                                                                                                                                                                                                                                                                                                                                                                                                                                                                                                                       |
| pathToSolverResults                         | Folder where SBML solver results are located.                                                                                                                                                                                                                                                                                                                                                                                                                                                                                                                                                                                                                                                                                                                                                                                                                                                                                                                                                                                                                                                                                                                                                                                                                                                                                                                                                                                                                                         |
| solverResultFileName                        | Name of the result file (minus csv file extension) produced by the solver for all latin-hypercube sampling experiments.                                                                                                                                                                                                                                                                                                                                                                                                                                                                                                                                                                                                                                                                                                                                                                                                                                                                                                                                                                                                                                                                                                                                                                                                                                                                                                                                                               |
| measure                                     | Name of each simulation response measure to consider in the analysis. The name of the measure should be the tag value. The scale of that measure should be specified as an attribute. For example: <code>&lt;measure scale='microns'&gt;displacement&lt; /measure&gt;</code>                                                                                                                                                                                                                                                                                                                                                                                                                                                                                                                                                                                                                                                                                                                                                                                                                                                                                                                                                                                                                                                                                                                                                                                                          |
| eFAST Sampling Specific Settings:           |                                                                                                                                                                                                                                                                                                                                                                                                                                                                                                                                                                                                                                                                                                                                                                                                                                                                                                                                                                                                                                                                                                                                                                                                                                                                                                                                                                                                                                                                                       |
| efastCurves                                 | Number of resample curves to employ in eFAST Sampling. See [1].                                                                                                                                                                                                                                                                                                                                                                                                                                                                                                                                                                                                                                                                                                                                                                                                                                                                                                                                                                                                                                                                                                                                                                                                                                                                                                                                                                                                                       |
| efastCurveSamples                           | The number of parameter values to select from each eFAST Curve.                                                                                                                                                                                                                                                                                                                                                                                                                                                                                                                                                                                                                                                                                                                                                                                                                                                                                                                                                                                                                                                                                                                                                                                                                                                                                                                                                                                                                       |
| Intervention Specific Settings:             |                                                                                                                                                                                                                                                                                                                                                                                                                                                                                                                                                                                                                                                                                                                                                                                                                                                                                                                                                                                                                                                                                                                                                                                                                                                                                                                                                                                                                                                                                       |
| sbmlRunResultsFile                          | Path to solver output where the model has been run to steady state.                                                                                                                                                                                                                                                                                                                                                                                                                                                                                                                                                                                                                                                                                                                                                                                                                                                                                                                                                                                                                                                                                                                                                                                                                                                                                                                                                                                                                   |
| newParamFileName                            | Name to give the intervention containing newly generated SBML model.                                                                                                                                                                                                                                                                                                                                                                                                                                                                                                                                                                                                                                                                                                                                                                                                                                                                                                                                                                                                                                                                                                                                                                                                                                                                                                                                                                                                                  |
